# Supplementary material
Source: Springer Nature journal article supplement (https://www.springermedizin.de/resource/supplementary/40170_2014_130_MOESM8_ESM.pdf/25787632)

# <sup>13</sup>C Tracer analysis in isolated mitochondria

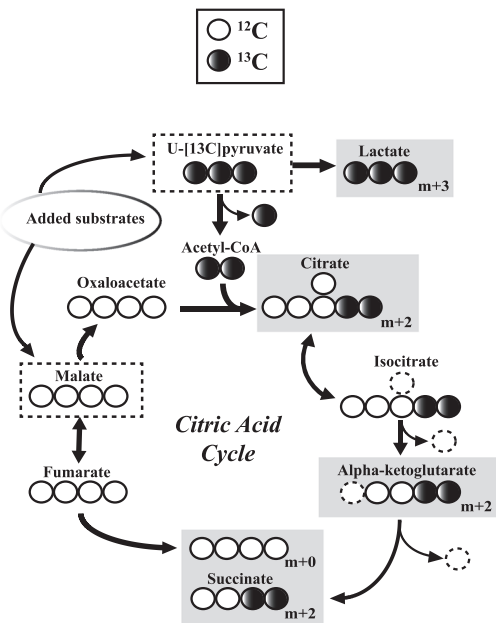**B**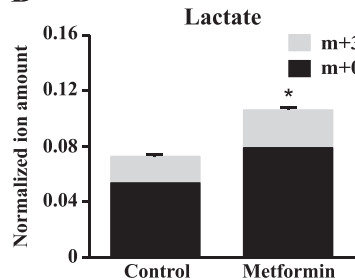**C**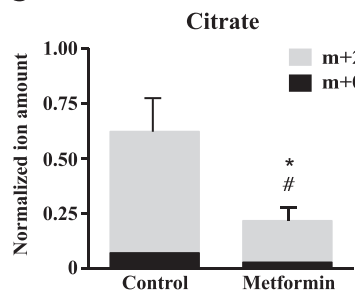**E**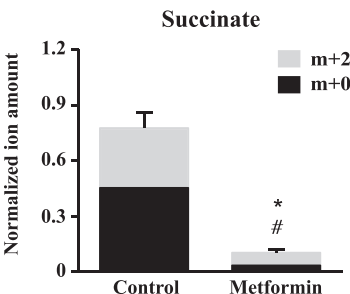**D**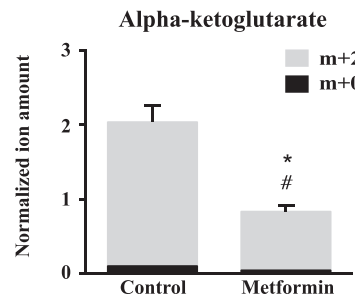

Supplement: MOESM8 [file 25787632]
